# Supplementary material
Source: PubMed Central journal article supplement (PMC4679051)
Supplement: pnas.1508782112.sd01.pdf [file pnas.1508782112.sd01.pdf]

## Online Datasets

**Dataset S1.** Raw data ( $\delta^{15}\text{N}$  ‰) for amino acids extracted from the soy-wheat diet.

| Soy-wheat blend (diet) |                                      | Samples analysed (units: $\delta^{15}\text{N}$ ‰) |       |       |       | Parameters |          |
|------------------------|--------------------------------------|---------------------------------------------------|-------|-------|-------|------------|----------|
|                        |                                      | 1                                                 | 2     | 3     | 4     | mean       | $\sigma$ |
| <b>Amino acids</b>     | <i>Alanine</i>                       | -3.83                                             | -5.61 | -3.86 | -4.31 | -4.40      | 0.84     |
|                        | <i>Glycine</i>                       | -3.52                                             | -4.65 | -5.30 | -4.78 | -4.56      | 0.75     |
|                        | <i>Valine</i>                        | -5.22                                             | -5.25 | -3.75 | -4.70 | -4.73      | 0.70     |
|                        | <i>Leucine</i>                       | -2.59                                             | -2.72 | -3.07 | -2.94 | -2.83      | 0.21     |
|                        | <i>Isoleucine</i>                    | -4.45                                             | -4.53 | -3.87 | -3.60 | -4.11      | 0.45     |
|                        | <i>Aspartic acid +<br/>Threonine</i> | -6.56                                             | -5.35 | -4.17 | -6.65 | -5.68      | 1.17     |
|                        | <i>Glutamic acid</i>                 | -3.83                                             | -4.36 | -3.87 | -4.50 | -4.14      | 0.34     |
|                        | <i>Phenylalanine</i>                 | 3.55                                              | 2.87  | 3.40  | 2.46  | 3.07       | 0.50     |

**Dataset S2.** Raw data ( $\delta^{15}\text{N}$  ‰) for amino acids extracted from the cranberry leaf diet.

| Cranberry leaves (diet) |                                      | Samples analysed (units: $\delta^{15}\text{N}$ ‰) |       |       | Parameters |          |
|-------------------------|--------------------------------------|---------------------------------------------------|-------|-------|------------|----------|
|                         |                                      | 1                                                 | 2     | 3     | mean       | $\sigma$ |
| <b>Amino acids</b>      | <i>Alanine</i>                       | 5.55                                              | 4.37  | 5.74  | 5.22       | 0.74     |
|                         | <i>Glycine</i>                       | -1.22                                             | 1.48  | 2.40  | 0.89       | 1.88     |
|                         | <i>Valine</i>                        | 7.70                                              | 7.65  | 7.82  | 7.72       | 0.09     |
|                         | <i>Leucine</i>                       | 9.32                                              | 8.77  | 8.66  | 8.92       | 0.36     |
|                         | <i>Isoleucine</i>                    | 7.55                                              | 8.91  | 7.91  | 8.12       | 0.70     |
|                         | <i>Aspartic acid +<br/>Threonine</i> | 11.19                                             | 11.58 | 8.75  | 10.51      | 1.54     |
|                         | <i>Glutamic acid</i>                 | 7.70                                              | 7.16  | 7.42  | 7.43       | 0.27     |
|                         | <i>Phenylalanine</i>                 | 15.22                                             | 15.69 | 14.93 | 15.28      | 0.38     |

**Dataset S3.** Raw data ( $\delta^{15}\text{N}$  ‰) for amino acids extracted from the fall armyworm diet.

| Insect (diet)      |                                      | Samples analysed (units: $\delta^{15}\text{N}$ ‰) |       |      | Parameters |          |
|--------------------|--------------------------------------|---------------------------------------------------|-------|------|------------|----------|
|                    |                                      | 1                                                 | 2     | 3    | mean       | $\sigma$ |
| <b>Amino acids</b> | <i>Alanine</i>                       | 4.58                                              | 4.85  | 5.01 | 4.81       | 0.22     |
|                    | <i>Glycine</i>                       | 0.13                                              | -0.08 | 0.68 | 0.24       | 0.39     |
|                    | <i>Valine</i>                        | 2.27                                              | 3.10  | 3.31 | 2.89       | 0.55     |
|                    | <i>Leucine</i>                       | 2.51                                              | 2.38  | 2.42 | 2.44       | 0.07     |
|                    | <i>Isoleucine</i>                    | 4.67                                              | 5.74  | 4.97 | 5.13       | 0.55     |
|                    | <i>Aspartic acid +<br/>Threonine</i> | 3.71                                              | 3.78  | 4.27 | 3.92       | 0.31     |
|                    | <i>Glutamic acid</i>                 | 4.74                                              | 4.99  | 5.55 | 5.09       | 0.41     |
|                    | <i>Phenylalanine</i>                 | 4.96                                              | 5.87  | 5.65 | 5.49       | 0.47     |

**Dataset S4.** Raw data ( $\delta^{15}\text{N}$  ‰) for amino acids extracted from the maple wood diet.

| Maple wood (diet)  |                                      | Samples analysed (units: $\delta^{15}\text{N}$ ‰) |       |        | Parameters |          |
|--------------------|--------------------------------------|---------------------------------------------------|-------|--------|------------|----------|
|                    |                                      | 1                                                 | 2     | 3      | mean       | $\sigma$ |
| <b>Amino acids</b> | <i>Alanine</i>                       | -11.18                                            | 2.59  |        | -4.30      | 9.74     |
|                    | <i>Glycine</i>                       | -23.83                                            | -8.97 | -19.19 | -17.33     | 7.61     |
|                    | <i>Valine</i>                        | -9.64                                             | 2.31  | -13.38 | -6.90      | 8.19     |
|                    | <i>Leucine</i>                       | -8.74                                             | 1.56  | -14.00 | -7.06      | 7.91     |
|                    | <i>Isoleucine</i>                    | -14.54                                            | 0.84  |        | -6.85      | 10.87    |
|                    | <i>Aspartic acid +<br/>Threonine</i> |                                                   | 5.14  | -2.43  | 1.35       | 5.35     |
|                    | <i>Glutamic acid</i>                 | -10.94                                            | 0.54  | -12.39 | -7.60      | 7.09     |
|                    | <i>Phenylalanine</i>                 | -2.38                                             | 8.37  | -3.31  | 0.89       | 6.49     |

**Dataset S5.** Raw data ( $\delta^{15}\text{N}$  ‰) for amino acids extracted from the birch wood diet.

| Birch wood (diet)  |                                      | Samples analysed (units: $\delta^{15}\text{N}$ ‰) |        |        | Parameters |          |
|--------------------|--------------------------------------|---------------------------------------------------|--------|--------|------------|----------|
|                    |                                      | 1                                                 | 2      | 3      | mean       | $\sigma$ |
| <b>Amino acids</b> | <i>Alanine</i>                       | -8.73                                             | -6.58  | -12.50 | -9.27      | 3.00     |
|                    | <i>Glycine</i>                       | -17.17                                            | -11.21 | -17.61 | -15.33     | 3.57     |
|                    | <i>Valine</i>                        | -8.13                                             | -5.73  | -11.08 | -8.31      | 2.68     |
|                    | <i>Leucine</i>                       | -13.27                                            | -7.17  | -10.91 | -10.45     | 3.08     |
|                    | <i>Isoleucine</i>                    | -7.76                                             |        |        | -7.76      |          |
|                    | <i>Aspartic acid +<br/>Threonine</i> | -8.46                                             | -7.01  | -10.55 | -8.67      | 1.78     |
|                    | <i>Glutamic acid</i>                 | -6.89                                             | -6.16  | -10.46 | -7.84      | 2.30     |
|                    | <i>Phenylalanine</i>                 | 1.03                                              | 2.70   | -1.31  | 0.81       | 2.02     |

**Dataset S6.** Raw data ( $\delta^{15}\text{N}$  ‰) for amino acids extracted from the shiitake mushroom diet.

| Fungus (diet)      |                                      | Samples analysed (units: $\delta^{15}\text{N}$ ‰) |       |       | Parameters |          |
|--------------------|--------------------------------------|---------------------------------------------------|-------|-------|------------|----------|
|                    |                                      | 1                                                 | 2     | 3     | mean       | $\sigma$ |
| <b>Amino acids</b> | <i>Alanine</i>                       | 0.85                                              | -0.58 | -0.12 | 0.05       | 0.73     |
|                    | <i>Glycine</i>                       | -3.03                                             | -5.57 | -5.97 | -4.86      | 1.59     |
|                    | <i>Valine</i>                        | -0.66                                             | -6.04 | -6.83 | -4.51      | 3.36     |
|                    | <i>Leucine</i>                       | 1.80                                              | 0.00  | 0.82  | 0.87       | 0.90     |
|                    | <i>Isoleucine</i>                    | 0.04                                              | 0.77  | 1.07  | 0.62       | 0.53     |
|                    | <i>Aspartic acid +<br/>Threonine</i> | 3.70                                              | 0.89  | 0.34  | 1.64       | 1.80     |
|                    | <i>Glutamic acid</i>                 | 8.77                                              | 3.31  | 2.64  | 4.90       | 3.36     |
|                    | <i>Phenylalanine</i>                 | 8.68                                              | 4.45  | 4.33  | 5.82       | 2.48     |

**Dataset S7.** Raw data ( $\delta^{15}\text{N}$  ‰) for amino acids extracted from the growth media used to culture *Streptomyces*.

| Growth media (diet) |                                      | Samples analysed (units: $\delta^{15}\text{N}$ ‰) |       |       | Parameters |          |
|---------------------|--------------------------------------|---------------------------------------------------|-------|-------|------------|----------|
|                     |                                      | 1                                                 | 2     | 3     | mean       | $\sigma$ |
| <b>Amino acids</b>  | <i>Alanine</i>                       | -0.55                                             | 0.69  | 0.17  | 0.10       | 0.62     |
|                     | <i>Glycine</i>                       | -8.93                                             | -7.96 | -8.48 | -8.45      | 0.48     |
|                     | <i>Valine</i>                        | 3.90                                              | 3.82  | 3.97  | 3.90       | 0.07     |
|                     | <i>Leucine</i>                       | -1.23                                             | -1.11 | -1.58 | -1.31      | 0.24     |
|                     | <i>Isoleucine</i>                    | 4.55                                              | 4.00  | 4.29  | 4.28       | 0.28     |
|                     | <i>Aspartic acid +<br/>Threonine</i> | 1.09                                              | 1.46  | 1.98  | 1.51       | 0.44     |
|                     | <i>Glutamic acid</i>                 | 5.78                                              | 5.53  | 5.18  | 5.50       | 0.30     |
|                     | <i>Phenylalanine</i>                 | 5.90                                              | 6.63  | 6.29  | 6.27       | 0.37     |

**Dataset S8.** Raw data ( $\delta^{15}\text{N}$  ‰) for amino acids extracted from the growth media used to culture *E. coli*.

| Growth media (diet) |                                      | Samples analysed (units: $\delta^{15}\text{N}$ ‰) |       |       | Parameters |          |
|---------------------|--------------------------------------|---------------------------------------------------|-------|-------|------------|----------|
|                     |                                      | 1                                                 | 2     | 3     | mean       | $\sigma$ |
| <b>Amino acids</b>  | <i>Alanine</i>                       | 0.15                                              | -0.10 | -0.34 | -0.10      | 0.24     |
|                     | <i>Glycine</i>                       | -0.56                                             | -0.33 | -0.13 | -0.34      | 0.22     |
|                     | <i>Valine</i>                        | 2.70                                              | 3.67  | 3.12  | 3.17       | 0.49     |
|                     | <i>Leucine</i>                       | 1.44                                              | 1.62  | 1.72  | 1.60       | 0.14     |
|                     | <i>Isoleucine</i>                    | 3.24                                              | 3.32  | 2.82  | 3.13       | 0.27     |
|                     | <i>Aspartic acid +<br/>Threonine</i> | 2.32                                              | 2.40  | 2.66  | 2.46       | 0.18     |
|                     | <i>Glutamic acid</i>                 | 6.43                                              | 6.53  | 6.79  | 6.58       | 0.18     |
|                     | <i>Phenylalanine</i>                 | 3.23                                              | 3.25  | 3.23  | 3.24       | 0.01     |

**Dataset S9.** Raw data ( $\delta^{15}\text{N}$  ‰) for amino acids extracted from the oak leaf diet provisioned to the leaf-cutter ants.

| Oak leaves (diet)  |                                      | Samples analysed (units: $\delta^{15}\text{N}$ ‰) |        |        |        |        | Parameters |          |
|--------------------|--------------------------------------|---------------------------------------------------|--------|--------|--------|--------|------------|----------|
|                    |                                      | 1                                                 | 2      | 3      | 4      | 5      | mean       | $\sigma$ |
| <b>Amino acids</b> | <i>Alanine</i>                       | -11.92                                            | -14.90 | -11.09 | -11.67 | -10.16 | -11.95     | 1.79     |
|                    | <i>Glycine</i>                       | -12.62                                            | -17.55 | -12.71 | -13.76 | -14.03 | -14.13     | 2.01     |
|                    | <i>Valine</i>                        | -13.52                                            | -13.97 | -12.71 | -12.81 | -15.16 | -13.63     | 1.00     |
|                    | <i>Leucine</i>                       | -13.11                                            | -17.55 | -12.58 | -12.35 | -14.57 | -14.03     | 2.15     |
|                    | <i>Isoleucine</i>                    | -16.47                                            | -17.39 | -12.63 | -13.89 | -12.83 | -14.64     | 2.17     |
|                    | <i>Aspartic acid +<br/>Threonine</i> | -15.08                                            | -16.69 | -13.22 | -16.27 | -17.44 | -15.74     | 1.65     |
|                    | <i>Glutamic acid</i>                 | -14.08                                            | -14.04 | -11.47 | -14.14 | -15.11 | -13.77     | 1.36     |
|                    | <i>Phenylalanine</i>                 | -5.20                                             | -7.01  | -2.90  | -6.63  | -5.83  | -5.51      | 1.62     |

**Dataset S10.** Raw data ( $\delta^{15}\text{N}$  ‰) for amino acids extracted from enoki fungi (*Flammulina velutipes*) cultured on the soy-wheat diet.

| Fungus (consumer)  |                                      | Samples analysed (units: $\delta^{15}\text{N}$ ‰) |       |       |       |   | Parameters |          |
|--------------------|--------------------------------------|---------------------------------------------------|-------|-------|-------|---|------------|----------|
|                    |                                      | 1                                                 | 2     | 3     | 4     | 5 | mean       | $\sigma$ |
| <b>Amino acids</b> | <i>Alanine</i>                       | 2.22                                              | 3.07  | 2.56  | 3.20  |   | 2.76       | 0.46     |
|                    | <i>Glycine</i>                       | 4.88                                              | 6.19  | 4.72  | 5.88  |   | 5.42       | 0.73     |
|                    | <i>Valine</i>                        |                                                   | 2.66  | 3.76  | 4.25  |   | 3.56       | 0.81     |
|                    | <i>Leucine</i>                       |                                                   | 2.51  | 2.14  | 2.68  |   | 2.44       | 0.27     |
|                    | <i>Isoleucine</i>                    |                                                   | 0.18  | 1.74  | -1.00 |   | 0.31       | 1.38     |
|                    | <i>Aspartic acid +<br/>Threonine</i> | -1.19                                             | -0.62 | -1.59 | -2.68 |   | -1.52      | 0.87     |
|                    | <i>Glutamic acid</i>                 | 3.54                                              | 3.65  | 3.42  | 3.58  |   | 3.55       | 0.09     |
|                    | <i>Phenylalanine</i>                 | 3.27                                              | 3.16  | 3.59  | 3.74  |   | 3.44       | 0.27     |

**Dataset S11.** Raw data ( $\delta^{15}\text{N}$  ‰) for amino acids extracted from the fungus, *Trichoderma viridae*, cultured on the soy-wheat diet.

| Fungus (consumer)  |                                  | Samples analysed (units: $\delta^{15}\text{N}$ ‰) |       |       | Parameters |          |
|--------------------|----------------------------------|---------------------------------------------------|-------|-------|------------|----------|
|                    |                                  | 1                                                 | 2     | 3     | mean       | $\sigma$ |
| <b>Amino acids</b> | <i>Alanine</i>                   |                                                   | -1.24 | -0.92 | -1.08      | 0.23     |
|                    | <i>Glycine</i>                   | -2.12                                             | 0.21  | 2.28  | 0.13       | 2.20     |
|                    | <i>Valine</i>                    |                                                   | 0.37  | 1.04  | 0.70       | 0.48     |
|                    | <i>Leucine</i>                   | -3.05                                             | 0.57  | 0.16  | -0.78      | 1.98     |
|                    | <i>Isoleucine</i>                | 1.27                                              | 0.23  | 0.43  | 0.64       | 0.55     |
|                    | <i>Aspartic acid + Threonine</i> | 3.31                                              | 2.29  | 3.06  | 2.89       | 0.53     |
|                    | <i>Glutamic acid</i>             | 2.42                                              | 1.58  | 1.26  | 1.75       | 0.60     |
|                    | <i>Phenylalanine</i>             | 3.49                                              | 2.70  | 3.20  | 3.13       | 0.40     |

**Dataset S12.** Raw data ( $\delta^{15}\text{N}$  ‰) for amino acids extracted from the fungus, *Leucoagaricus gongylophorus*, cultured on the soy-wheat diet.

| Fungus (consumer)  |                                  | Samples analysed (units: $\delta^{15}\text{N}$ ‰) |       |       | Parameters |          |
|--------------------|----------------------------------|---------------------------------------------------|-------|-------|------------|----------|
|                    |                                  | 1                                                 | 2     | 3     | mean       | $\sigma$ |
| <b>Amino acids</b> | <i>Alanine</i>                   |                                                   |       | 0.26  | 0.26       |          |
|                    | <i>Glycine</i>                   | -11.01                                            | -8.74 | -7.46 | -9.07      | 1.80     |
|                    | <i>Valine</i>                    |                                                   |       |       |            |          |
|                    | <i>Leucine</i>                   |                                                   |       |       |            |          |
|                    | <i>Isoleucine</i>                |                                                   | 2.03  | -1.82 | 0.11       | 2.72     |
|                    | <i>Aspartic acid + Threonine</i> | 5.22                                              | -0.13 | 1.38  | 2.16       | 2.76     |
|                    | <i>Glutamic acid</i>             | 3.33                                              | 1.46  | 2.53  | 2.44       | 0.94     |
|                    | <i>Phenylalanine</i>             | 4.44                                              | 2.68  | 2.78  | 3.30       | 0.99     |

**Dataset S13.** Raw data ( $\delta^{15}\text{N}$  ‰) for amino acids extracted from fairy shrimp, *Branchinecta*, cultured on the soy-wheat diet.

| Crustacean (consumer) |                                      | Samples analysed (units: $\delta^{15}\text{N}$ ‰) |       |       | Parameters |          |
|-----------------------|--------------------------------------|---------------------------------------------------|-------|-------|------------|----------|
|                       |                                      | 1                                                 | 2     | 3     | mean       | $\sigma$ |
| <b>Amino acids</b>    | <i>Alanine</i>                       | 4.44                                              | 4.73  | 7.84  | 5.67       | 1.88     |
|                       | <i>Glycine</i>                       | -5.71                                             | -4.96 | -3.75 | -4.81      | 0.98     |
|                       | <i>Valine</i>                        | 3.92                                              | 2.69  | 3.01  | 3.20       | 0.64     |
|                       | <i>Leucine</i>                       | 6.58                                              | 2.14  | 3.86  | 4.19       | 2.24     |
|                       | <i>Isoleucine</i>                    | 15.85                                             | 10.27 | 10.63 | 12.25      | 3.13     |
|                       | <i>Aspartic acid +<br/>Threonine</i> | 3.92                                              | 1.45  | 4.56  | 3.31       | 1.64     |
|                       | <i>Glutamic acid</i>                 | 3.05                                              | 2.77  | 3.72  | 3.18       | 0.49     |
|                       | <i>Phenylalanine</i>                 | 2.84                                              | 4.07  | 4.16  | 3.69       | 0.74     |

**Dataset S14.** Raw data ( $\delta^{15}\text{N}$  ‰) for amino acids extracted from mice, *Mus musculus*, cultured on the soy-wheat diet.

| Mammal (consumer)  |                                      | Samples analysed (units: $\delta^{15}\text{N}$ ‰) |      |      | Parameters |          |
|--------------------|--------------------------------------|---------------------------------------------------|------|------|------------|----------|
|                    |                                      | 1                                                 | 2    | 3    | mean       | $\sigma$ |
| <b>Amino acids</b> | <i>Alanine</i>                       | 4.48                                              | 5.50 | 2.75 | 4.24       | 1.39     |
|                    | <i>Glycine</i>                       | 1.42                                              | 0.61 | 2.37 | 1.47       | 0.88     |
|                    | <i>Valine</i>                        | 3.69                                              | 1.81 | 0.34 | 1.95       | 1.68     |
|                    | <i>Leucine</i>                       | 3.97                                              | 5.72 | 2.98 | 4.22       | 1.39     |
|                    | <i>Isoleucine</i>                    | 3.38                                              | 3.13 | 2.79 | 3.10       | 0.30     |
|                    | <i>Aspartic acid +<br/>Threonine</i> | -1.43                                             | 0.03 | 2.34 | 0.31       | 1.90     |
|                    | <i>Glutamic acid</i>                 | 4.46                                              | 5.06 | 3.85 | 4.46       | 0.61     |
|                    | <i>Phenylalanine</i>                 | 4.14                                              | 4.69 | 3.38 | 4.07       | 0.66     |

**Dataset S15.** Raw data ( $\delta^{15}\text{N}$  ‰) for amino acids extracted from red flour beetles, *Tribolium castaneum*, cultured on the soy-wheat diet.

| Insect (consumer)  |                                      | Samples analysed (units: $\delta^{15}\text{N}$ ‰) |       |       | Parameters |          |
|--------------------|--------------------------------------|---------------------------------------------------|-------|-------|------------|----------|
|                    |                                      | 1                                                 | 2     | 3     | mean       | $\sigma$ |
| <b>Amino acids</b> | <i>Alanine</i>                       | 2.45                                              | 1.59  | 2.27  | 2.10       | 0.45     |
|                    | <i>Glycine</i>                       | 0.69                                              | -0.75 | -4.30 | -1.45      | 2.57     |
|                    | <i>Valine</i>                        | -0.91                                             | 2.41  | 2.97  | 1.49       | 2.10     |
|                    | <i>Leucine</i>                       | -2.52                                             | -0.84 | 0.90  | -0.82      | 1.71     |
|                    | <i>Isoleucine</i>                    | 6.28                                              | 2.81  | 3.42  | 4.17       | 1.85     |
|                    | <i>Aspartic acid +<br/>Threonine</i> | 2.66                                              | 1.09  | 1.81  | 1.85       | 0.78     |
|                    | <i>Glutamic acid</i>                 | 1.43                                              | 4.59  | 4.26  | 3.43       | 1.74     |
|                    | <i>Phenylalanine</i>                 | 2.92                                              | 4.89  | 5.16  | 4.32       | 1.23     |

**Dataset S16.** Raw data ( $\delta^{15}\text{N}$  ‰) for amino acids extracted from the black mold, *Aspergillus niger*, cultured on cranberry leaves.

| Fungus (consumer)  |                                      | Samples analysed (units: $\delta^{15}\text{N}$ ‰) |       |       | Parameters |          |
|--------------------|--------------------------------------|---------------------------------------------------|-------|-------|------------|----------|
|                    |                                      | 1                                                 | 2     | 3     | mean       | $\sigma$ |
| <b>Amino acids</b> | <i>Alanine</i>                       | 11.15                                             | 12.47 | 12.24 | 11.95      | 0.71     |
|                    | <i>Glycine</i>                       | 7.31                                              | 11.19 | 9.58  | 9.36       | 1.95     |
|                    | <i>Valine</i>                        | 11.59                                             | 12.43 | 13.16 | 12.39      | 0.78     |
|                    | <i>Leucine</i>                       | 11.99                                             | 12.10 | 13.99 | 12.69      | 1.13     |
|                    | <i>Isoleucine</i>                    | 11.62                                             | 11.27 | 12.08 | 11.66      | 0.40     |
|                    | <i>Aspartic acid +<br/>Threonine</i> | 15.50                                             | 12.92 | 13.81 | 14.08      | 1.31     |
|                    | <i>Glutamic acid</i>                 | 15.44                                             | 15.89 | 16.33 | 15.89      | 0.44     |
|                    | <i>Phenylalanine</i>                 | 15.71                                             | 14.77 | 14.96 | 15.15      | 0.50     |



**Dataset S17.** Raw data ( $\delta^{15}\text{N}$  ‰) for amino acids extracted from the carnivorous fungus, *Beauveria bassiana*, cultured on fall armyworm larvae.

| Fungus (consumer)  |                                      | Samples analysed (units: $\delta^{15}\text{N}$ ‰) |      |       | Parameters |          |
|--------------------|--------------------------------------|---------------------------------------------------|------|-------|------------|----------|
|                    |                                      | 1                                                 | 2    | 3     | mean       | $\sigma$ |
| <b>Amino acids</b> | <i>Alanine</i>                       | 12.29                                             | 5.89 | 11.15 | 9.78       | 3.41     |
|                    | <i>Glycine</i>                       | 3.22                                              | 0.47 | 3.27  | 2.32       | 1.60     |
|                    | <i>Valine</i>                        | 13.99                                             | 7.87 | 13.13 | 11.66      | 3.31     |
|                    | <i>Leucine</i>                       | 11.16                                             | 3.63 | 7.14  | 7.31       | 3.77     |
|                    | <i>Isoleucine</i>                    | 9.96                                              | 3.73 | 9.34  | 7.68       | 3.43     |
|                    | <i>Aspartic acid +<br/>Threonine</i> | 6.11                                              | 1.92 | 3.82  | 3.95       | 2.10     |
|                    | <i>Glutamic acid</i>                 | 15.42                                             | 9.71 | 11.93 | 12.35      | 2.88     |
|                    | <i>Phenylalanine</i>                 | 7.24                                              | 3.07 | 6.32  | 5.54       | 2.19     |

**Dataset S18.** Raw data ( $\delta^{15}\text{N}$  ‰) for amino acids extracted from carnivorous beetles, *Dermestes*, cultured on dried fall armyworm homogenate.

| Insect (consumer)  |                                      | Samples analysed (units: $\delta^{15}\text{N}$ ‰) |       |       | Parameters |          |
|--------------------|--------------------------------------|---------------------------------------------------|-------|-------|------------|----------|
|                    |                                      | 1                                                 | 2     | 3     | mean       | $\sigma$ |
| <b>Amino acids</b> | <i>Alanine</i>                       | 7.11                                              | 8.43  | 9.11  | 8.22       | 1.02     |
|                    | <i>Glycine</i>                       | 3.90                                              | 9.43  | 8.24  | 7.19       | 2.91     |
|                    | <i>Valine</i>                        | 9.89                                              | 7.13  | 10.71 | 9.24       | 1.88     |
|                    | <i>Leucine</i>                       | 5.59                                              | 6.17  | 3.39  | 5.05       | 1.47     |
|                    | <i>Isoleucine</i>                    | 8.06                                              | 8.76  | 6.02  | 7.62       | 1.42     |
|                    | <i>Aspartic acid +<br/>Threonine</i> | 2.89                                              | 4.10  | 4.52  | 3.84       | 0.85     |
|                    | <i>Glutamic acid</i>                 | 10.21                                             | 10.59 | 10.43 | 10.41      | 0.20     |
|                    | <i>Phenylalanine</i>                 | 1.53                                              | 4.70  | 3.15  | 3.13       | 1.58     |

**Dataset S19.** Raw data ( $\delta^{15}\text{N}$  ‰) for amino acids extracted from a freshwater fish, *Poecilia reticulata*, cultured on dried fall armyworm homogenate.

| Fish (consumer)    |                                      | Samples analysed (units: $\delta^{15}\text{N}$ ‰) |       |       |       | Parameters |          |
|--------------------|--------------------------------------|---------------------------------------------------|-------|-------|-------|------------|----------|
|                    |                                      | 1                                                 | 2     | 3     | 4     | mean       | $\sigma$ |
| <b>Amino acids</b> | <i>Alanine</i>                       | 9.79                                              | 6.86  | 7.88  | 7.20  | 7.93       | 1.31     |
|                    | <i>Glycine</i>                       | -0.37                                             | 0.51  | 1.78  | 4.46  | 1.60       | 2.11     |
|                    | <i>Valine</i>                        | 4.24                                              | 5.63  | 8.21  | 7.68  | 6.44       | 1.84     |
|                    | <i>Leucine</i>                       | 2.16                                              | 2.38  | 1.97  | 5.07  | 2.89       | 1.46     |
|                    | <i>Isoleucine</i>                    | 9.23                                              | 10.20 | 12.56 | 9.56  | 10.39      | 1.50     |
|                    | <i>Aspartic acid +<br/>Threonine</i> | 1.27                                              | 0.77  | 4.97  | 4.90  | 2.98       | 2.27     |
|                    | <i>Glutamic acid</i>                 | 13.81                                             | 11.27 | 14.01 | 13.20 | 13.07      | 1.25     |
|                    | <i>Phenylalanine</i>                 | 6.04                                              | 4.18  | 7.72  | 5.70  | 5.91       | 1.46     |

**Dataset S20.** Raw data ( $\delta^{15}\text{N}$  ‰) for amino acids extracted from a white-rot wood fungus, *Irpex lacteus*, cultured on maple wood substrates.

| Fungus (consumer)  |                                      | Samples analysed (units: $\delta^{15}\text{N}$ ‰) |       |        | Parameters |          |
|--------------------|--------------------------------------|---------------------------------------------------|-------|--------|------------|----------|
|                    |                                      | 1                                                 | 2     | 3      | mean       | $\sigma$ |
| <b>Amino acids</b> | <i>Alanine</i>                       | -8.70                                             | -7.66 |        | -8.18      | 0.73     |
|                    | <i>Glycine</i>                       | -13.76                                            | -9.29 | -16.30 | -13.12     | 3.55     |
|                    | <i>Valine</i>                        | -3.43                                             | -6.77 |        | -5.10      | 2.36     |
|                    | <i>Leucine</i>                       | -4.21                                             | -6.92 | -8.45  | -6.53      | 2.15     |
|                    | <i>Isoleucine</i>                    | 4.40                                              |       | -9.95  | -2.78      | 10.15    |
|                    | <i>Aspartic acid +<br/>Threonine</i> | -0.09                                             | -4.95 | -7.25  | -4.10      | 3.66     |
|                    | <i>Glutamic acid</i>                 | -4.68                                             | -4.29 | -6.78  | -5.25      | 1.34     |
|                    | <i>Phenylalanine</i>                 | -3.89                                             | -4.96 | -3.51  | -4.12      | 0.75     |

**Dataset S21.** Raw data ( $\delta^{15}\text{N}$  ‰) for amino acids extracted from a brown-rot wood fungus, *Gloeophyllum trabeum*, cultured on maple wood substrates.

| Fungus (consumer)  |                                      | Samples analysed (units: $\delta^{15}\text{N}$ ‰) |        |        | Parameters |          |
|--------------------|--------------------------------------|---------------------------------------------------|--------|--------|------------|----------|
|                    |                                      | 1                                                 | 2      | 3      | mean       | $\sigma$ |
| <b>Amino acids</b> | <i>Alanine</i>                       | 2.20                                              | -6.55  |        | -2.17      | 6.19     |
|                    | <i>Glycine</i>                       | -19.29                                            | -21.46 | -20.63 | -20.46     | 1.09     |
|                    | <i>Valine</i>                        | 2.66                                              | -8.20  |        | -2.77      | 7.68     |
|                    | <i>Leucine</i>                       | -4.31                                             | -8.70  | -9.61  | -7.54      | 2.84     |
|                    | <i>Isoleucine</i>                    |                                                   | -4.66  | -1.86  | -3.26      | 1.98     |
|                    | <i>Aspartic acid +<br/>Threonine</i> | -4.54                                             | -10.67 | -10.54 | -8.58      | 3.50     |
|                    | <i>Glutamic acid</i>                 | 0.07                                              | -4.20  | -0.59  | -1.57      | 2.30     |
|                    | <i>Phenylalanine</i>                 | 1.98                                              | -3.18  | 0.66   | -0.18      | 2.68     |

**Dataset S22.** Raw data ( $\delta^{15}\text{N}$  ‰) for amino acids extracted from a white-rot wood fungus, *Irpex lacteus*, cultured on birch wood substrates.

| Fungus (consumer)  |                                      | Samples analysed (units: $\delta^{15}\text{N}$ ‰) |        |       | Parameters |          |
|--------------------|--------------------------------------|---------------------------------------------------|--------|-------|------------|----------|
|                    |                                      | 1                                                 | 2      | 3     | mean       | $\sigma$ |
| <b>Amino acids</b> | <i>Alanine</i>                       | -0.21                                             | -3.93  | -1.49 | -1.88      | 1.89     |
|                    | <i>Glycine</i>                       | -5.00                                             | -10.44 | -6.44 | -7.29      | 2.82     |
|                    | <i>Valine</i>                        | 0.94                                              | -2.91  | 0.32  | -0.55      | 2.07     |
|                    | <i>Leucine</i>                       | -2.58                                             | -6.58  | -5.31 | -4.82      | 2.04     |
|                    | <i>Isoleucine</i>                    | 3.65                                              | -1.36  | 0.34  | 0.88       | 2.54     |
|                    | <i>Aspartic acid +<br/>Threonine</i> | -0.33                                             | -5.21  | -1.93 | -2.49      | 2.49     |
|                    | <i>Glutamic acid</i>                 | 2.07                                              | -3.03  | -1.71 | -0.89      | 2.64     |
|                    | <i>Phenylalanine</i>                 | 1.31                                              | -1.57  | 0.30  | 0.01       | 1.46     |

**Dataset S23.** Raw data ( $\delta^{15}\text{N}$  ‰) for amino acids extracted from a brown-rot wood fungus, *Gloeophyllum trabeum*, cultured on birch wood substrates.

| Fungus (consumer)  |                                      | Samples analysed (units: $\delta^{15}\text{N}$ ‰) |   |       | Parameters |          |
|--------------------|--------------------------------------|---------------------------------------------------|---|-------|------------|----------|
|                    |                                      | 1                                                 | 2 | 3     | mean       | $\sigma$ |
| <b>Amino acids</b> | <i>Alanine</i>                       | 2.20                                              |   |       | 2.20       |          |
|                    | <i>Glycine</i>                       | -19.29                                            |   |       | -19.29     |          |
|                    | <i>Valine</i>                        | 2.66                                              |   |       | 2.66       |          |
|                    | <i>Leucine</i>                       | -4.31                                             |   |       | -4.31      |          |
|                    | <i>Isoleucine</i>                    |                                                   |   |       |            |          |
|                    | <i>Aspartic acid +<br/>Threonine</i> | -4.54                                             |   | -1.41 | -2.97      | 2.21     |
|                    | <i>Glutamic acid</i>                 | 0.07                                              |   | 1.14  | 0.60       | 0.75     |
|                    | <i>Phenylalanine</i>                 | 1.98                                              |   | 0.54  | 1.26       | 1.02     |

**Dataset S24.** Raw data ( $\delta^{15}\text{N}$  ‰) for amino acids extracted from the flour moth, *Plodia interpunctella*, cultured on homogenates of dried shiitake mushrooms.

| Insect (consumer)  |                                      | Samples analysed (units: $\delta^{15}\text{N}$ ‰) |       |       | Parameters |          |
|--------------------|--------------------------------------|---------------------------------------------------|-------|-------|------------|----------|
|                    |                                      | 1                                                 | 2     | 3     | mean       | $\sigma$ |
| <b>Amino acids</b> | <i>Alanine</i>                       | 9.92                                              | 8.28  | 9.78  | 9.33       | 0.91     |
|                    | <i>Glycine</i>                       | -2.33                                             | -0.10 | 6.25  | 1.27       | 4.45     |
|                    | <i>Valine</i>                        | 7.50                                              | 5.39  | 6.45  | 6.45       | 1.05     |
|                    | <i>Leucine</i>                       | 6.61                                              | 2.31  | 6.96  | 5.30       | 2.59     |
|                    | <i>Isoleucine</i>                    |                                                   |       |       |            |          |
|                    | <i>Aspartic acid +<br/>Threonine</i> | 8.57                                              | 9.53  | 12.53 | 10.21      | 2.07     |
|                    | <i>Glutamic acid</i>                 | 16.51                                             | 13.01 | 14.47 | 14.66      | 1.76     |
|                    | <i>Phenylalanine</i>                 | 8.94                                              | 6.50  | 7.16  | 7.53       | 1.26     |

**Dataset S25.** Raw data ( $\delta^{15}\text{N}$  ‰) for amino acids extracted from the actinomycetous bacterium, *Streptomyces* (sirexAA-E), cultured in a broth of yeast-extract, sucrose, and tryptic soy.

| Bacterium (consumer) |                                      | Samples analysed (units: $\delta^{15}\text{N}$ ‰) |       |       | Parameters |          |
|----------------------|--------------------------------------|---------------------------------------------------|-------|-------|------------|----------|
|                      |                                      | 1                                                 | 2     | 3     | mean       | $\sigma$ |
| <b>Amino acids</b>   | <i>Alanine</i>                       | 4.12                                              | 2.66  | 3.57  | 3.45       | 0.74     |
|                      | <i>Glycine</i>                       | -1.68                                             | -1.59 | -1.12 | -1.46      | 0.30     |
|                      | <i>Valine</i>                        | 5.42                                              | 5.81  | 6.37  | 5.87       | 0.48     |
|                      | <i>Leucine</i>                       | 1.93                                              | 1.82  | 1.72  | 1.82       | 0.11     |
|                      | <i>Isoleucine</i>                    | 9.21                                              | 8.50  | 9.57  | 9.09       | 0.55     |
|                      | <i>Aspartic acid +<br/>Threonine</i> | 4.63                                              | 4.62  | 4.34  | 4.53       | 0.16     |
|                      | <i>Glutamic acid</i>                 | 12.57                                             | 12.62 | 12.21 | 12.47      | 0.23     |
|                      | <i>Phenylalanine</i>                 | 6.83                                              | 6.56  | 5.87  | 6.42       | 0.50     |

**Dataset S26.** Raw data ( $\delta^{15}\text{N}$  ‰) for amino acids extracted from the proteobacterium, *E. coli* (DH5- $\alpha$ ), cultured in a broth of yeast-extract and tryptone.

| Bacterium (consumer) |                                      | Samples analysed (units: $\delta^{15}\text{N}$ ‰) |       |       | Parameters |          |
|----------------------|--------------------------------------|---------------------------------------------------|-------|-------|------------|----------|
|                      |                                      | 1                                                 | 2     | 3     | mean       | $\sigma$ |
| <b>Amino acids</b>   | <i>Alanine</i>                       | 6.02                                              | 5.94  | 6.62  | 6.19       | 0.37     |
|                      | <i>Glycine</i>                       | 0.23                                              | 1.35  | 0.45  | 0.68       | 0.59     |
|                      | <i>Valine</i>                        | 6.41                                              | 6.30  | 6.56  | 6.42       | 0.13     |
|                      | <i>Leucine</i>                       | 3.44                                              | 2.57  | 3.66  | 3.22       | 0.58     |
|                      | <i>Isoleucine</i>                    | 3.32                                              | 3.12  | 3.07  | 3.17       | 0.13     |
|                      | <i>Aspartic acid +<br/>Threonine</i> | 6.08                                              | 7.57  | 6.20  | 6.62       | 0.83     |
|                      | <i>Glutamic acid</i>                 | 13.50                                             | 13.32 | 13.43 | 13.42      | 0.09     |
|                      | <i>Phenylalanine</i>                 | 3.33                                              | 3.79  | 3.64  | 3.59       | 0.23     |

**Dataset S27.** Raw data ( $\delta^{15}\text{N}$  ‰) for amino acids extracted from pupae of the leaf-cutter ant, *Acromyrmex echinator*, collected from fungus-garden colonies.

| Insect (consumer)  |                                      | Samples analysed (units: $\delta^{15}\text{N}$ ‰) |       |       |       |       | Parameters |          |
|--------------------|--------------------------------------|---------------------------------------------------|-------|-------|-------|-------|------------|----------|
|                    |                                      | 1                                                 | 2     | 3     | 4     | 5     | mean       | $\sigma$ |
| <b>Amino acids</b> | <i>Alanine</i>                       | -0.24                                             | -1.01 | -0.09 | -0.66 | 0.36  | -0.33      | 0.53     |
|                    | <i>Glycine</i>                       | -0.59                                             | -3.42 | -5.83 | -5.94 | -4.12 | -3.98      | 2.19     |
|                    | <i>Valine</i>                        | 0.83                                              | 0.43  | -0.85 | -2.43 | -0.26 | -0.46      | 1.28     |
|                    | <i>Leucine</i>                       | -0.17                                             | -0.37 | -1.81 | -2.67 | 0.81  | -0.84      | 1.39     |
|                    | <i>Isoleucine</i>                    | -1.75                                             | -0.62 | -0.71 | -1.15 | 2.69  | -0.31      | 1.73     |
|                    | <i>Aspartic acid +<br/>Threonine</i> | -0.67                                             | -2.90 | -2.90 | -2.10 | -0.29 | -1.77      | 1.23     |
|                    | <i>Glutamic acid</i>                 | 1.55                                              | 0.20  | 1.51  | -0.69 | 3.67  | 1.25       | 1.65     |
|                    | <i>Phenylalanine</i>                 | -4.78                                             | -5.27 | -4.38 | -5.35 | -4.45 | -4.84      | 0.45     |

**Dataset S28.** Raw data ( $\delta^{15}\text{N}$  ‰) for amino acids extracted from the fungus, *Leucoagaricus gongylophorus*, cultured within leaf-cutter ant fungus-gardens.

| Fungus (consumer)  |                                      | Samples analysed (units: $\delta^{15}\text{N}$ ‰) |       |        |        |       | Parameters |          |
|--------------------|--------------------------------------|---------------------------------------------------|-------|--------|--------|-------|------------|----------|
|                    |                                      | 1                                                 | 2     | 3      | 4      | 5     | mean       | $\sigma$ |
| <b>Amino acids</b> | <i>Alanine</i>                       | -3.19                                             |       | -6.08  | -3.78  | -7.82 | -5.22      | 2.14     |
|                    | <i>Glycine</i>                       | -9.31                                             | -5.15 | -10.17 | -11.28 | -5.16 | -8.21      | 2.88     |
|                    | <i>Valine</i>                        | -3.47                                             |       | -4.71  | -5.41  | -2.44 | -4.01      | 1.32     |
|                    | <i>Leucine</i>                       | -3.65                                             | -8.38 | -4.21  | -5.35  | -0.80 | -4.48      | 2.75     |
|                    | <i>Isoleucine</i>                    | -4.36                                             |       | -3.61  | -4.85  | 0.44  | -3.10      | 2.41     |
|                    | <i>Aspartic acid +<br/>Threonine</i> | -1.71                                             | -1.74 | -3.76  | -3.15  | -1.85 | -2.44      | 0.95     |
|                    | <i>Glutamic acid</i>                 | -6.27                                             | -5.16 | -6.79  | -6.95  | -4.99 | -6.03      | 0.91     |
|                    | <i>Phenylalanine</i>                 | -4.89                                             | -4.84 | -4.79  | -4.94  | -4.86 | -4.86      | 0.06     |

**Dataset S29.** Raw data ( $\delta^{15}\text{N}$  ‰) for amino acids extracted from the fungus, *Escovopsis*, which was sampled within leaf-cutter ant fungus-gardens.

| Fungus (consumer)  |                                  | Samples analysed (units: $\delta^{15}\text{N}$ ‰) |       |       |        |   | Parameters |          |
|--------------------|----------------------------------|---------------------------------------------------|-------|-------|--------|---|------------|----------|
|                    |                                  | 1                                                 | 2     | 3     | 4      | 5 | mean       | $\sigma$ |
| <b>Amino acids</b> | <i>Alanine</i>                   | 0.20                                              | -1.11 | 3.42  | 2.21   |   | 1.18       | 2.02     |
|                    | <i>Glycine</i>                   | -11.92                                            | -8.93 | -8.18 | -10.63 |   | -9.92      | 1.68     |
|                    | <i>Valine</i>                    | -1.93                                             | -1.33 | 0.47  | -1.81  |   | -1.15      | 1.11     |
|                    | <i>Leucine</i>                   | -1.69                                             | 0.37  | -2.02 | -2.96  |   | -1.58      | 1.40     |
|                    | <i>Isoleucine</i>                | 1.66                                              |       | 3.16  | 0.33   |   | 1.72       | 1.42     |
|                    | <i>Aspartic acid + Threonine</i> | -4.54                                             | -3.88 | 0.06  | -2.40  |   | -2.69      | 2.04     |
|                    | <i>Glutamic acid</i>             | 5.50                                              | 7.24  | 11.27 | 8.06   |   | 8.02       | 2.42     |
|                    | <i>Phenylalanine</i>             | 0.17                                              | 0.90  | 3.49  | 0.45   |   | 1.25       | 1.52     |

**Dataset S30.** Raw data ( $\delta^{15}\text{N}$  ‰) for amino acids extracted from the filamentous bacterium, *Pseudonocardia*, collected from leaf-cutter ant exoskeletons.

| Bacterium (consumer) |                                  | Samples analysed (units: $\delta^{15}\text{N}$ ‰) |       |       |       |       | Parameters |          |
|----------------------|----------------------------------|---------------------------------------------------|-------|-------|-------|-------|------------|----------|
|                      |                                  | 1                                                 | 2     | 3     | 4     | 5     | mean       | $\sigma$ |
| <b>Amino acids</b>   | <i>Alanine</i>                   |                                                   |       |       |       |       |            |          |
|                      | <i>Glycine</i>                   | 7.11                                              | 6.14  |       |       |       | 6.63       | 0.69     |
|                      | <i>Valine</i>                    |                                                   |       |       |       |       |            |          |
|                      | <i>Leucine</i>                   | 7.07                                              |       |       |       |       | 7.07       |          |
|                      | <i>Isoleucine</i>                |                                                   |       |       |       |       |            |          |
|                      | <i>Aspartic acid + Threonine</i> | 6.41                                              | 6.25  |       |       |       | 6.33       | 0.11     |
|                      | <i>Glutamic acid</i>             | 9.83                                              | 11.15 | 8.91  | 7.33  | 10.72 | 9.59       | 1.53     |
|                      | <i>Phenylalanine</i>             | -4.60                                             | -4.68 | -4.56 | -4.92 | -3.78 | -4.51      | 0.43     |
